# Supplementary material for: Providing Alternative Hosts and Nectar to Aphid Parasitoids in a Plum Orchard to Determine Resource Complementarity and Distance Range Effect on Biological Control
Source: MDPI journal article supplement (doi:10.3390/agronomy12010077), 2021-12-29
Supplement: s1 [file s1]

## SUPPLEMENTARY MATERIALS

**Table S1.** Pairwise comparison results for GLMM testing the effect of intercropping modality on the abundance of alternative hosts in the inter-row on September 26 (emmeans function). *Significant differences ( $p.value < 0.05$ ) are bolded.*

| Comparison    | Odds.ratio  | SE          | Df        | Lower CL    | Upper CL     | t.ratio     | p.value         |
|---------------|-------------|-------------|-----------|-------------|--------------|-------------|-----------------|
| Oats / Mixed  | <b>4.34</b> | <b>2.00</b> | <b>55</b> | <b>1.72</b> | <b>10.93</b> | <b>3.18</b> | <b>2.39E-03</b> |
| Oats / Vetch  | <b>2.80</b> | <b>1.42</b> | <b>55</b> | <b>1.02</b> | <b>7.72</b>  | <b>2.04</b> | <b>0.046</b>    |
| Mixed / Vetch | 0.65        | 0.37        | 55        | 0.20        | 2.06         | -0.76       | 0.453           |

**Table S2.** Pairwise comparison results for GLMM testing the effect of intercropping modality on the abundance of honeydew providers in the inter-row on September 26, October 29 and November 13 (emmeans function). *Significant differences ( $p.value < 0.05$ ) are bolded.*

| Date  | Comparison           | Odds.ratio  | SE          | Df        | Lower CL    | Upper CL    | t.ratio      | p.value         |
|-------|----------------------|-------------|-------------|-----------|-------------|-------------|--------------|-----------------|
| 09/26 | Oats / Mixed         | 4.57        | 1.40        | 55        | 2.47        | 8.46        | 4.96         | <b>7.17E-06</b> |
|       | Oats / Vetch         | 3.42        | 1.21        | 55        | 1.68        | 6.96        | 3.46         | <b>0.001</b>    |
|       | Mixed / Vetch        | 0.75        | 0.30        | 55        | 0.33        | 1.68        | -0.72        | 0.473           |
| 10/29 | Oats / Mixed         | 1.38        | 0.33        | 55        | 0.85        | 2.24        | 1.34         | 0.187           |
|       | Oats / Vetch         | 0.52        | 0.12        | 55        | 0.33        | 0.81        | -2.90        | <b>0.005</b>    |
|       | Mixed / Vetch        | 0.37        | 0.08        | 55        | 0.25        | 0.56        | -4.84        | <b>1.1E-05</b>  |
| 11/13 | <b>Oats / Mixed</b>  | <b>2.97</b> | <b>0.87</b> | <b>55</b> | <b>1.65</b> | <b>5.33</b> | <b>3.72</b>  | <b>4.72E-04</b> |
|       | Oats / Vetch         | 1.35        | 0.38        | 55        | 0.76        | 2.39        | 1.06         | 0.295           |
|       | <b>Mixed / Vetch</b> | <b>0.46</b> | <b>0.14</b> | <b>55</b> | <b>0.24</b> | <b>0.85</b> | <b>-2.52</b> | <b>0.015</b>    |

**Table S3.** Results summary of generalized linear mixed modelling of the effects of distance, intercrop modalities and their interaction on aphid and parasitism incidences and parasitism rate, in plum trees. Random effects considered were the orientation including the replicate. *Significant differences ( $p$ -value < 0.05) are bolded.*

| Date               | Explained variable   | Fixed effect       | Anova test following GLMMs |          |              |
|--------------------|----------------------|--------------------|----------------------------|----------|--------------|
|                    |                      |                    | Chisq                      | Df       | p-value      |
| 10/10 <sup>1</sup> | Aphid incidence      | Modality           | 1.0903                     | 2        | 0.580        |
|                    |                      | Distance           | 0.2619                     | 1        | 0.609        |
|                    |                      | Interaction        | 4.7625                     | 2        | 0.092        |
|                    | Parasitism incidence | Modality           | 1.3202                     | 2        | 0.517        |
|                    |                      | Distance           | 1.0539                     | 1        | 0.305        |
|                    |                      | Interaction        | 0.9360                     | 2        | 0.626        |
| 10/29              | Aphid incidence      | Modality           | 1.6996                     | 2        | 0.428        |
|                    |                      | Distance           | 2.4862                     | 1        | 0.115        |
|                    |                      | Interaction        | 2.4512                     | 2        | 0.294        |
|                    | Parasitism incidence | Modality           | 0.4592                     | 2        | 0.795        |
|                    |                      | Distance           | 0.0926                     | 1        | 0.761        |
|                    |                      | Interaction        | 0.5010                     | 2        | 0.778        |
|                    | Parasitism rate      | <b>Modality</b>    | <b>6.6492</b>              | <b>2</b> | <b>0.036</b> |
|                    |                      | Distance           | 0.4070                     | 1        | 0.524        |
|                    |                      | Interaction        | 2.3967                     | 2        | 0.302        |
| 11/13              | Aphid incidence      | <b>Modality</b>    | <b>7.5128</b>              | <b>2</b> | <b>0.023</b> |
|                    |                      | Distance           | 1.9049                     | 1        | 0.168        |
|                    |                      | <b>Interaction</b> | <b>10.5770</b>             | <b>2</b> | <b>0.005</b> |
|                    | Parasitism incidence | Modality           | 0.7350                     | 2        | 0.693        |
|                    |                      | Distance           | 0.0003                     | 1        | 0.986        |
|                    |                      | Interaction        | 1.4195                     | 2        | 0.492        |
|                    | Parasitism rate      | Modality           | 0.4076                     | 2        | 0.816        |
|                    |                      | Distance           | 0.8736                     | 1        | 0.350        |
|                    |                      | Interaction        | 2.9421                     | 2        | 0.230        |
| 11/27              | Parasitism incidence | Modality           | 0.6333                     | 2        | 0.729        |
|                    |                      | Distance           | 0.1852                     | 1        | 0.667        |
|                    |                      | Interaction        | 1.3513                     | 2        | 0.509        |
|                    | Parasitism rate      | <b>Modality</b>    | <b>6.7004</b>              | <b>2</b> | <b>0.035</b> |
|                    |                      | Distance           | 0.7679                     | 1        | 0.381        |
|                    |                      | Interaction        | 4.2237                     | 2        | 0.121        |
| 12/04              | Aphid incidence      | Modality           | 2.8223                     | 2        | 0.244        |
|                    |                      | Distance           | 0.7769                     | 1        | 0.378        |
|                    |                      | Interaction        | 2.2769                     | 2        | 0.320        |

<sup>1</sup> Data on parasitism rate on October 10 were not analysed.

**Table S4.** Pairwise comparison results for GLMMs testing the effect of intercropping modality and distance interaction on aphid incidence in plum trees on November 13 (type 3 Anova summary). *Significant differences ( $p$ -value < 0.05) are bolded.*

| Comparison    | Fixed effect       | Chisq          | Df       | p.value         |
|---------------|--------------------|----------------|----------|-----------------|
| Oats / Mixed  | <b>Modality</b>    | <b>5.3950</b>  | <b>1</b> | <b>0.020</b>    |
|               | Distance           | 1.9582         | 1        | 0.162           |
|               | <b>Interaction</b> | <b>6.0231</b>  | <b>1</b> | <b>0.014</b>    |
| Oats / Vetch  | <b>Modality</b>    | <b>8.0625</b>  | <b>1</b> | <b>0.005</b>    |
|               | Distance           | 2.5762         | 1        | 0.108           |
|               | <b>Interaction</b> | <b>12.3745</b> | <b>1</b> | <b>4.35E-04</b> |
| Mixed / Vetch | Modality           | 0.1132         | 1        | 0.737           |
|               | Distance           | 3.1695         | 1        | 0.075           |
|               | Interaction        | 0.6219         | 1        | 0.430           |

**Table S5.** Pairwise comparison results for GLMM testing the effect of intercropping modality on parasitism rate in plum aphids on October 29 and November 27 (emmeans function). *Significant differences ( $p$ -value < 0.05) are bolded.*

| Date  | Comparison           | Odds.ratio  | SE          | Df        | Lower CL    | Upper CL    | t.ratio      | p.value      |
|-------|----------------------|-------------|-------------|-----------|-------------|-------------|--------------|--------------|
| 10/29 | <b>Oats / Mixed</b>  | <b>0,61</b> | <b>0,14</b> | <b>63</b> | <b>0,39</b> | <b>0,97</b> | <b>-2,15</b> | <b>0,036</b> |
|       | <b>Oats / Vetch</b>  | <b>0,63</b> | <b>0,13</b> | <b>63</b> | <b>0,41</b> | <b>0,96</b> | <b>-2,20</b> | <b>0,031</b> |
|       | Mixed / Vetch        | 1,03        | 0,22        | 63        | 0,67        | 1,57        | 0,13         | 0,901        |
| 11/27 | Oats / Mixed         | 1,97        | 0,75        | 56        | 0,92        | 4,21        | 1,79         | 0,079        |
|       | Oats / Vetch         | 0,79        | 0,22        | 56        | 0,45        | 1,38        | -0,84        | 0,403        |
|       | <b>Mixed / Vetch</b> | <b>0,40</b> | <b>0,14</b> | <b>56</b> | <b>0,20</b> | <b>0,80</b> | <b>-2,67</b> | <b>0,010</b> |
